# Supplementary material for: No severe ozone depletion in the tropical stratosphere in recent decades
Source: Copernicus journal article supplement (doi:10.5194/egusphere-2023-2574), 2023-11-23
Supplement: Supplementary file 1 [file egusphere-2023-2574-supplement.pdf]

1 SUPPLEMENTARY DATA

2 **No severe ozone depletion in the tropical stratosphere in re-**  
3 **cent decades**

4 Jayanarayanan Kuttippurath<sup>1,\*</sup>, Gopalakrishna Pillai Gopikrishnan<sup>1</sup>, Rolf Müller<sup>2</sup>, Sophie  
5 Godin-Beekmann<sup>3</sup>, Jerome Brioude<sup>4</sup>

6 <sup>1</sup> CORAL, Indian Institute of Technology Kharagpur, Kharagpur–721302, India

7 <sup>2</sup> Institute of Energy and Climate Research (IEK-7), Forschungszentrum Jülich, Jülich Germany

8 <sup>3</sup> LATMOS, Sorbonne Université, UVSQ, CNRS, Paris, France

9 <sup>4</sup> Laboratoire de l'Atmosphère et des Cyclones (LACy), UMR 8105, Météo France/CNRS/Université de La Réu-  
10 nion, St Denis de La Réunion, France

11

12 *Correspondence to:* Jayanarayanan Kuttippurath (jayan@coral.iitkgp.ac.in)

13

14

15

16

17

18

19

20

21

22

23

**Table S1:** The location of SHADOZ ozonesonde observations.

| Location                      | Abbreviation | Latitude<br>in ° | Longitude in ° |
|-------------------------------|--------------|------------------|----------------|
| Ascension, UK                 | Ascen        | -7.56            | -14.22         |
| Suva, Fiji                    | Fiji         | -18.10           | 178.40         |
| Hilo, Hawaii                  | Hilo         | 19.40            | -155.40        |
| Irene, S. Africa              | Irene        | -25.90           | 28.20          |
| Watakosek, Java,<br>Indonesia | Java         | -7.60            | 112.70         |
| Kuala Lumpur,<br>Malaysia     | Kuala        | 2.73             | 101.70         |
| Nairobi, Kenya                | Nairobi      | -1.30            | 36.80          |
| Natal, Brazil                 | Natal        | -5.40            | -35.40         |
| Paramaribo, Surinam           | Paramaribo   | 5.80             | -55.21         |
| La Reunion Is, France         | Reunion      | -21.10           | 55.50          |
| Pago Pago, Am. Samoa          | Samoa        | -14.20           | -170.60        |
| San Cristobal,<br>Galapagos   | Sancrist     | -0.92            | -89.60         |

24

25

26

27

28

29

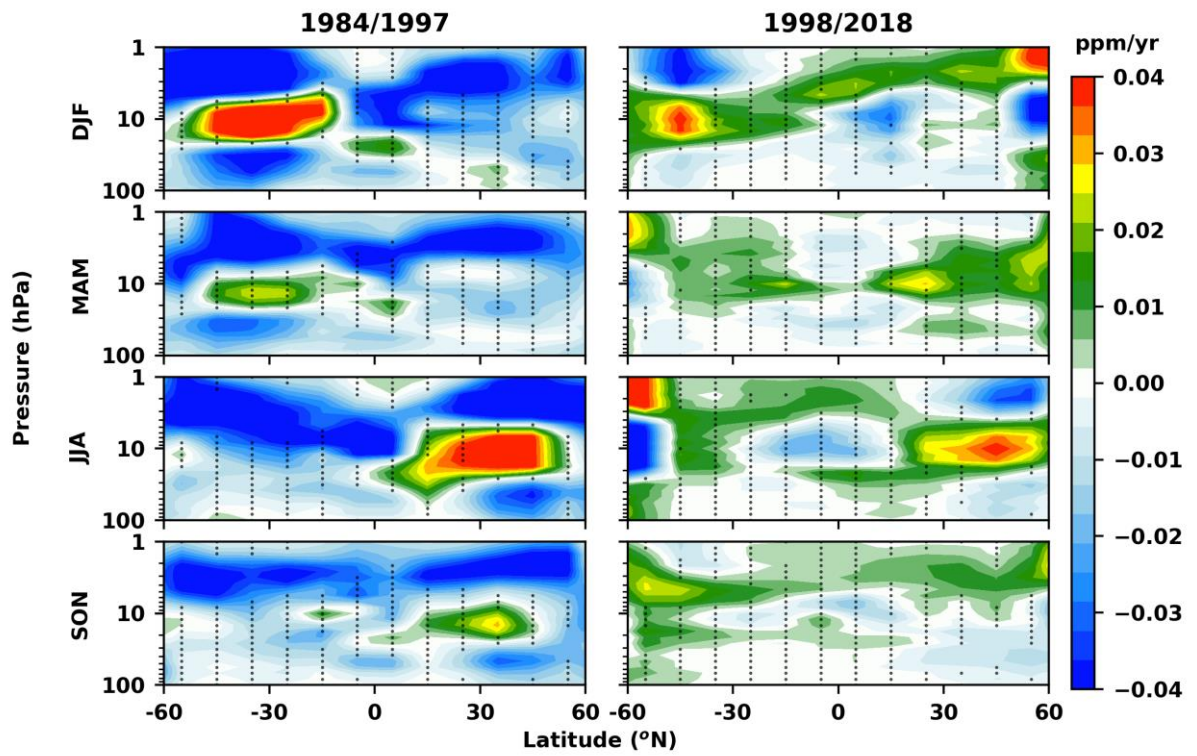

30

31 **Figure S1:** Trends in mixing ratio of ozone estimated for each season using the GOZCARDS data for  
 32 the periods 1984–1997 and 1998–2018. The hatched regions are statistically insignificant at 95% CI  
 33 level.

34

35

36

37

38

39

40

41

42

43

44

45

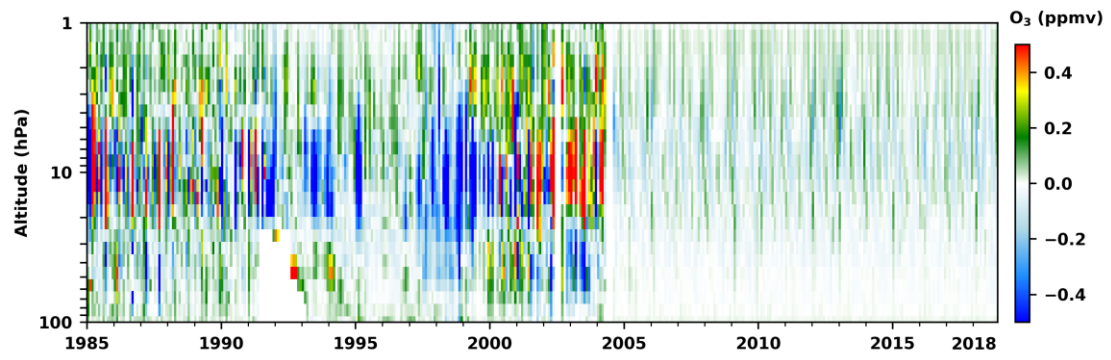

46

47 Figure S2: The difference in ozone estimated between GOZCARDS and SWOOSH satellite reanalysed  
48 ozone datasets for each month since 1985.

49

50

51

52

53

54

55

56

57

58

59

60

61

62

63

64

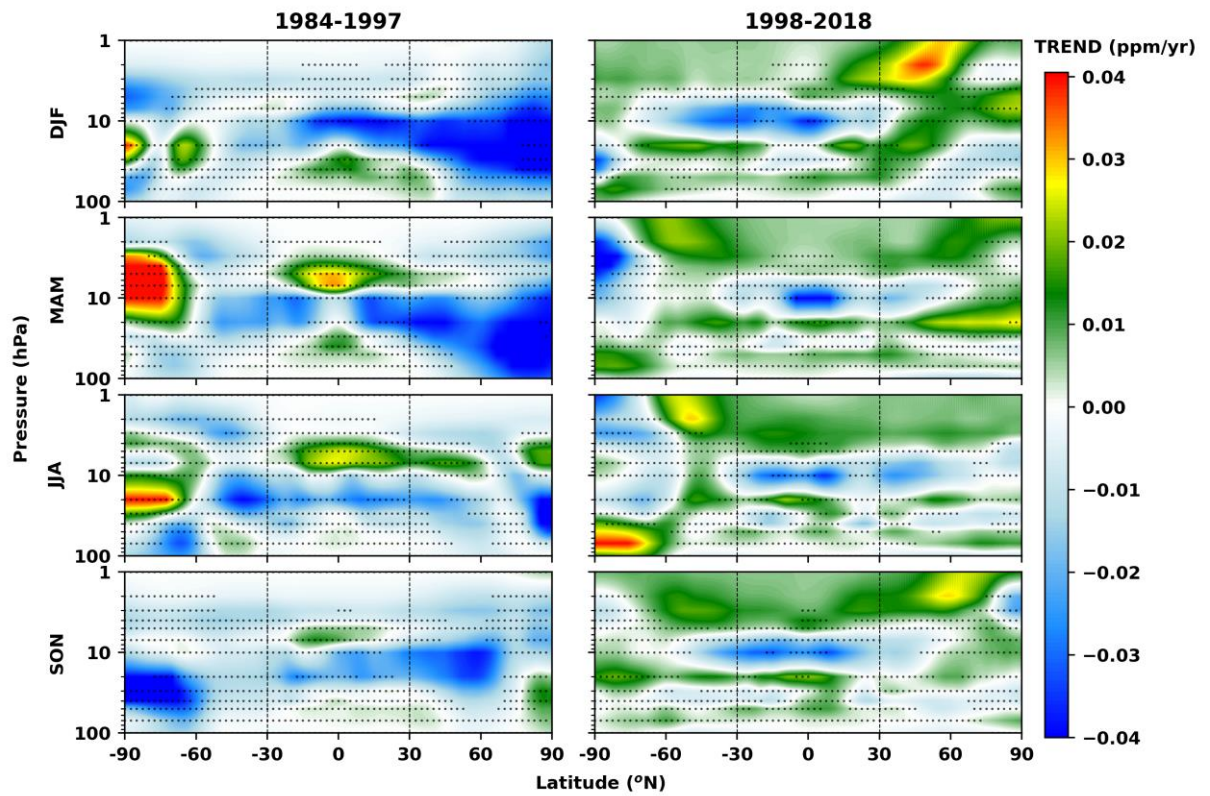

65

66 **Figure S3:** Trends in mixing ratio of ozone estimated for each season from MERRA-2 data for the  
 67 periods 1984-1996 and 1997-2018. The hatched regions are statistically insignificant at 95% CI  
 68 level.

69

70

71

72

73

74

75

76

77

78

79

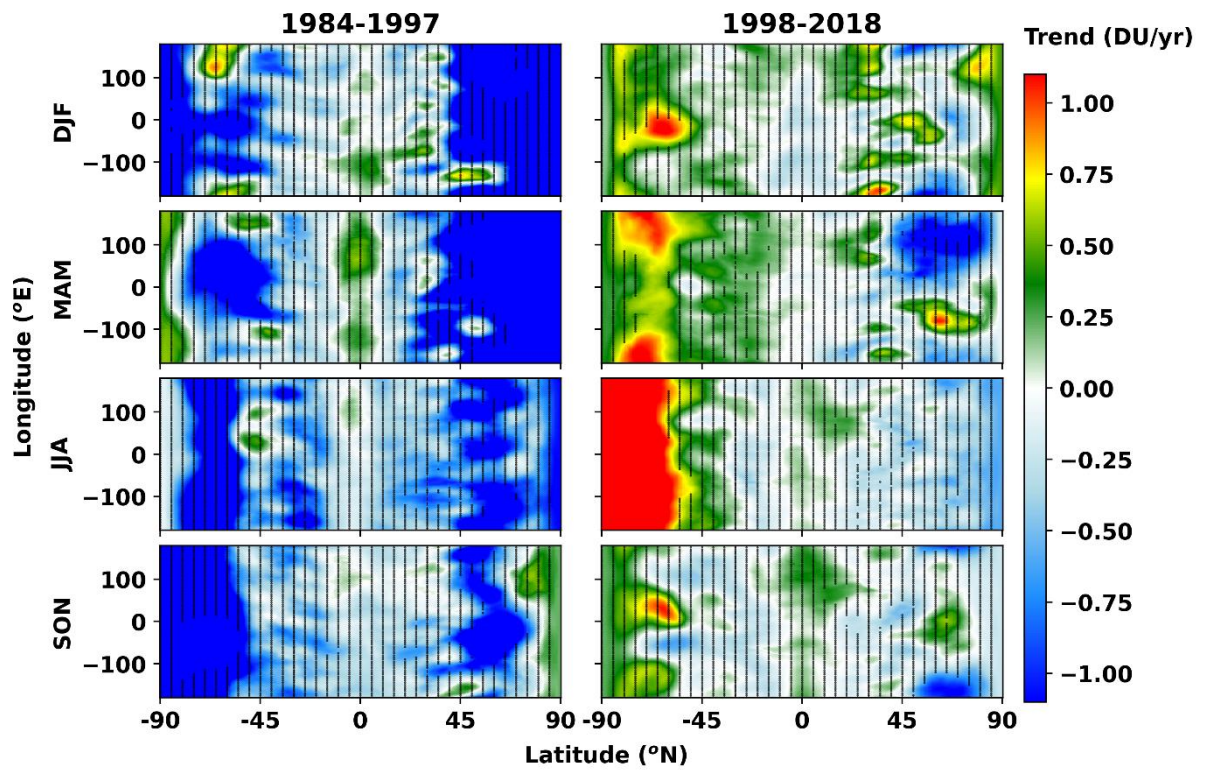

81

82 **Figure S4:** Trends in TCO estimated using the seasonally averaged data from MERRA-2 for the  
83 periods 1984-1997 and 1998-2018. The hatched regions are statistically insignificant at 95% CI  
84 level.

85

86

87

88

89

90

91

92

93

94

95

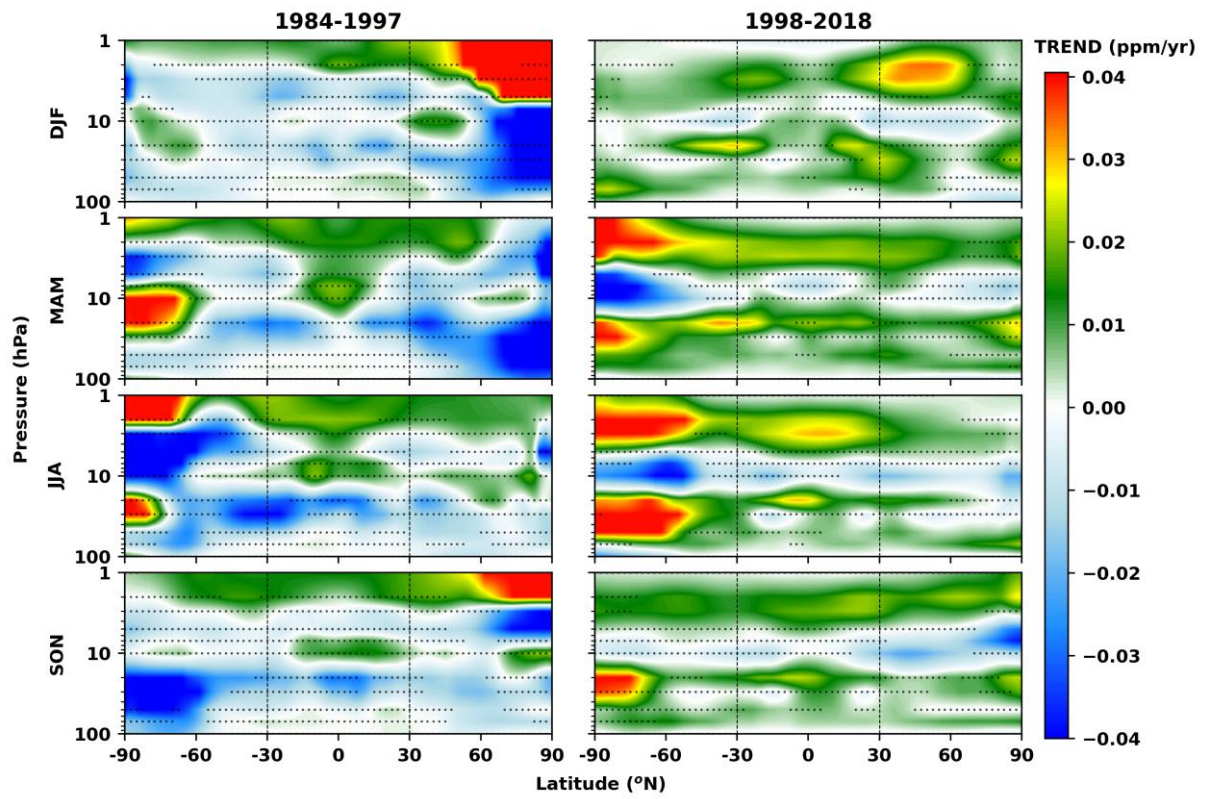

97

98 **Figure S5:** Trends in mixing ratio of ozone estimated for each season from ERA5 data for the periods  
 99 1984–1996 and 1997–2018. The hatched regions are statistically insignificant at 95% CI level.

100

101

102

103

104

105

106

107

108

109

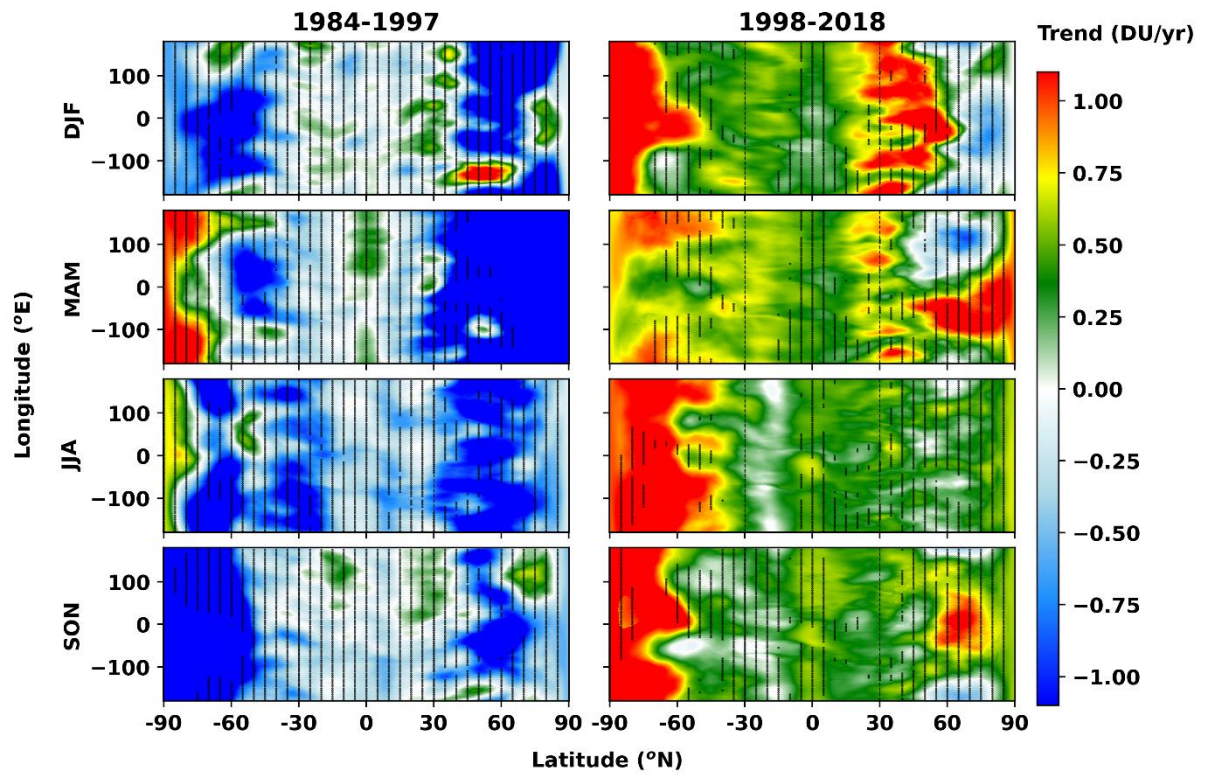

110

111 **Figure S6:** Trends in TCO estimated using the seasonally averaged data from ERA 5 for the periods  
 112 1984–1997 and 1998–2018. The hatched regions are statistically insignificant at 95% CI level.

113

114



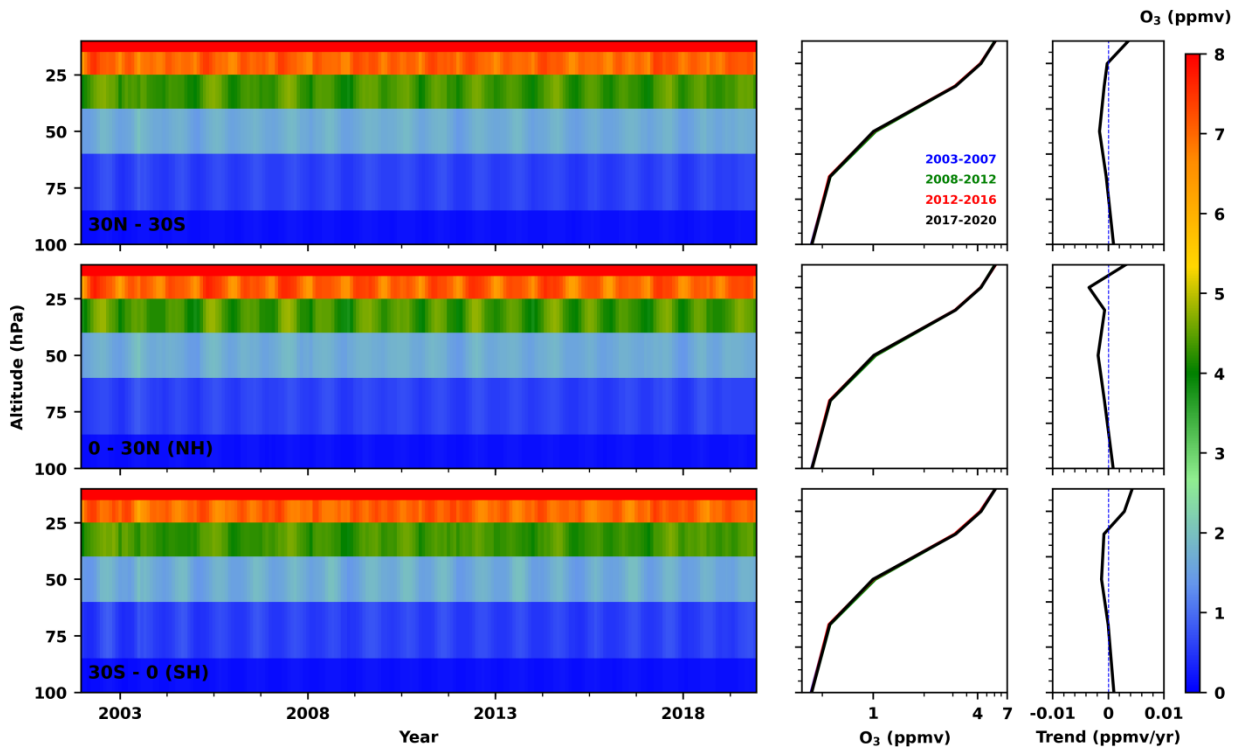

115

116 **Figure S7.** (Left Panel): Ozone profiles from CAMS reanalysis averaged for the tropics, NH and SH,  
 117 (Middle Panel) Mean distribution over each decade for different regions (Right Panel) and the yearly  
 118 averaged trends for the period 1980-2020.

119

120

121

122

123

124

125

126

127

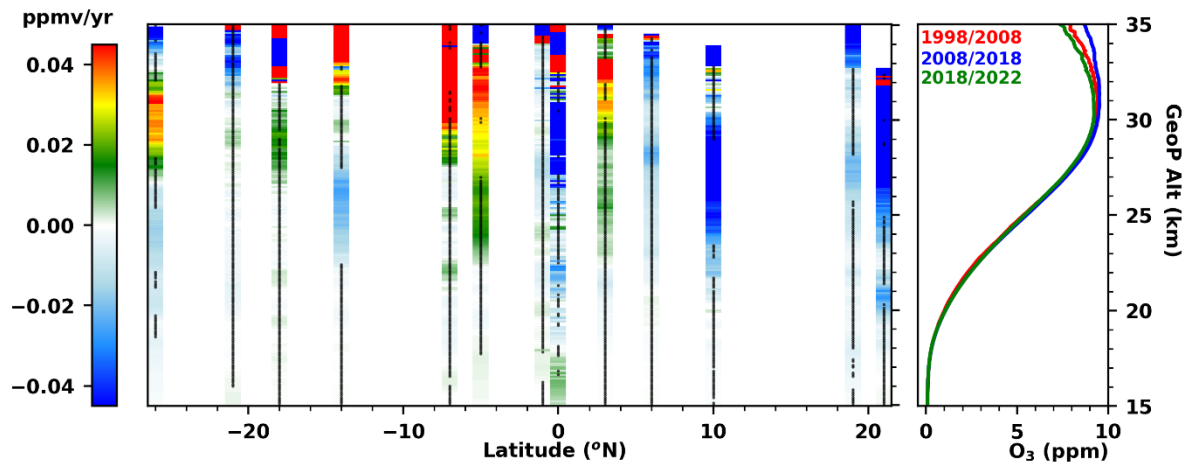

128

129 **Figure S8:** The latitudinal distribution of vertical trends in SHADOZ ozone observations from 1998  
 130 to 2022. The average of ozonesonde profiles different periods is shown on the right. The hatched  
 131 regions are statistically insignificant at 95% CI level.

132

133

134

135

136

137

138

139

140

141

142

143

144

145

146

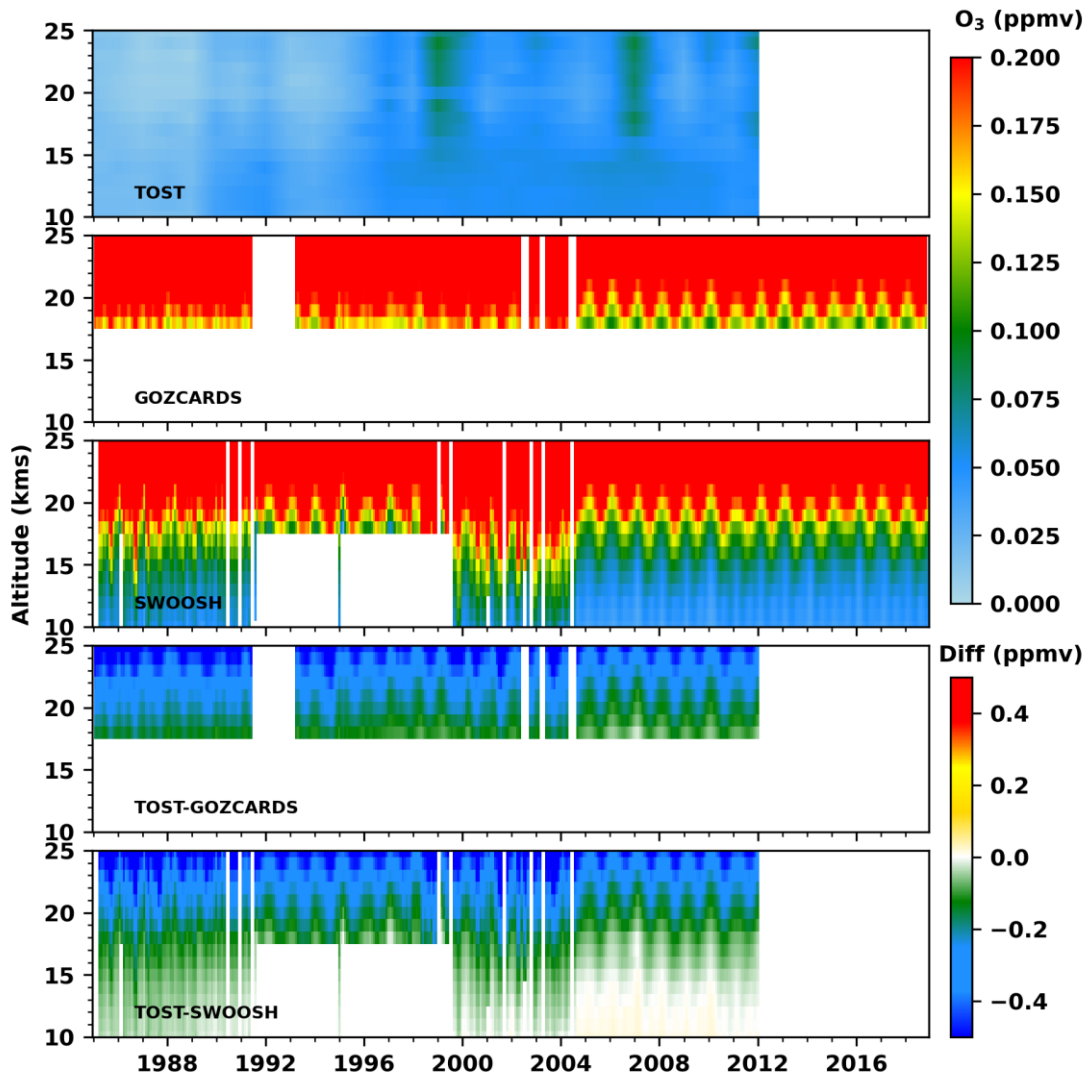

147

148 Figure S9: Yearly averaged ozone values in the TOST, GOZCARDS and SWOOSH data (top three  
 149 panels), and the difference in ozone values found between TOST and GOZCARDS and  
 150 TOST and SWOOSH (bottom two panels) data sets.

151

152

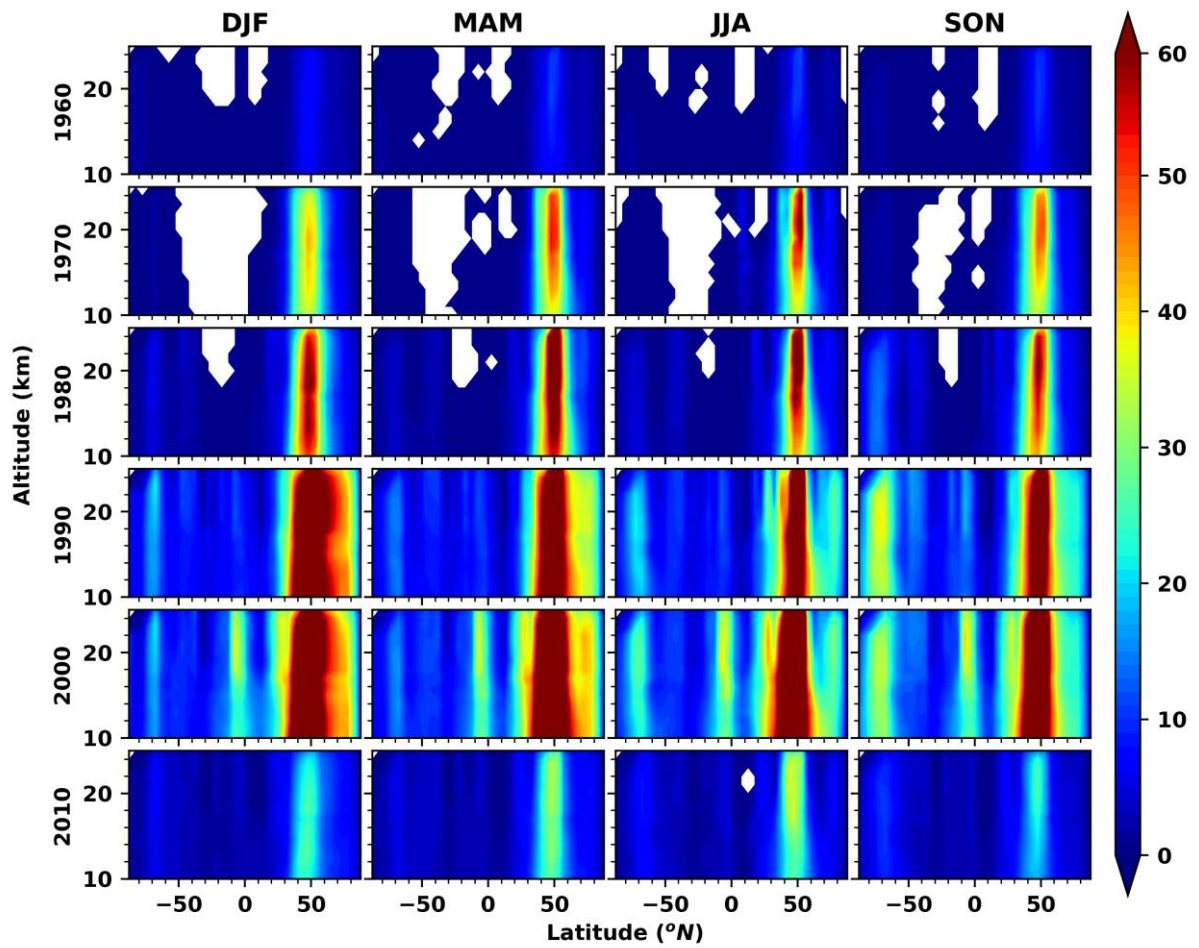

153

154 Figure S10: The number of profiles in TOST data in each period and altitude.

155

156

157

158

159

160

161

162 JK/V33/22112023/1542
