# Supplementary material for: No severe ozone depletion in the tropical stratosphere in recent decades
Source: Copernicus journal article supplement (doi:10.5194/egusphere-2023-2574), 2023-11-23
Supplement: Supplementary file [file egusphere-2023-2574-AC1-supplement.pdf]

## RESPONSE TO REFEREE #1 COMMENTS

Thank you very much for your time, review and comments on MS. Please find answers to specific comments below. Please find the response to queries and the corresponding change in the MS in **blue typeface**. We do hope that the referee will find the revised version more interesting and recommend a publication very soon.

### General:

- "i.e." and "e.g." should be in italics.
- Southern Hemisphere should be in capitals.
- check consistent use of either ERA-5, ERA 5 or ERA5 (now all three are used)  
**Done. We have used these, as suggested, throughout the MS (e.g. SH, ERA-5, e.g.).**

### Specific comments, suggestions, typos

- Abstract, line 16: change to "the amount of column ozone is relatively small"  
**Done. Please find it in line 15.**
- Abstract, line 17: add the range of TOC values at "high and mid-latitudes" (NH 275-425 DU; SH 275-350 DU; see for example Coldewey-Egbers et al. [2020] 10.5194/amt-13-1633-2020).  
**Done. Please find it in line 16.**
- Abstract, line 18-19. Change to "No observational evidence was found of indications or signatures of severe stratospheric ozone depletion ..."  
**Done. Please find it in line 17.**
- Abstract, line 20-21. Change to "Finally, current understanding and observational evidence does not provide any support for the possibility of an ozone hole occurring outside Antarctica today with ..."  
**Done. Please find it in line 19.**
- Introduction, line 26, add reference to Coldewey-Egbers et al. [2020]. Given what the paper is about it makes sense to add a recent reference in conjunction with London (1992).  
**Done. Please find it in line 25.**
- Introduction, line 26-27. Change to "The production of ozone is effective at low latitudes hence ozone mixing ratios at middle and high latitudes are smaller ..."  
**Done. Please find it in lines 25–26.**
- Introduction, line 28-30. The main reason why ozone columns increase is that atmospheric transport (Brewer-Dobson circulation) at high(er) latitudes is vertically downward. That causes air with similar mixing ratios to be to vertical levels with higher pressures and thus higher densities, even if mixing ratios remain the same or decrease, while the stratospheric column increases in geometrical thickness way from the tropics (tropical tropopause is at 16-18 km, outside of the tropics it is on average around 10 km). Somehow this should be reflected here.  
**Done. Some parts here are removed to shorten it, and are now not in the revised MS.**
- Introduction, line 33. Change to "has shown a dramatic seasonal decrease"

Done. Please find it in line 32.

- Introduction, line 34, suggest to change to “Understanding of stratospheric ozone chemistry, model simulations” ... “ozone loss theories” is a bit vague.  
Done. Please find it in line 33.
- Introduction, line 37. “e.g.” should be in italics.  
Done. Please find it in line 34.
- Introduction, line 38. Change to “... deepened in the 1980s and peaked ...”  
Done. Please find it in line 37.
- Introduction, line 39. Change to “... Antarctic lower stratosphere ...”  
Some sections of the MS are omitted to reduce its length, as suggested by the referee. Therefore, this section is no longer part of the revised MS.
- Introduction, line 43-52. This needs a makeover:  
In contrast, Arctic stratospheric temperatures are relatively high and the polar vortex is frequently disturbed by planetary waves formed by the interaction of upper tropospheric winds, orography and land-sea contrasts, manifested as sudden stratospheric warmings (SSWs). The lack of persistent cold temperatures restricts Arctic stratospheric chlorine activation and ozone loss (e.g. Solomon, 1999) and causes strong year to year variability (von der Gathen et al., 2021) with generally column ozone staying above 220 DU. Over Antarctic, on the other hand, springtime column ozone frequently falls below 220 DU. A weaker Brewer-Dobson circulation leads to lower stratospheric ozone amounts. In addition, a stronger, more persistent and much colder stratospheric vortex generally favors rapid springtime catalytic ozone destruction. Hence why the 220 DU column ozone threshold is widely used for characterizing the Ozone Hole. Such low values have been present ...” ... Ozone loss in other regions, including the Arctic, never reach similar and widespread low levels of ozone like during Antarctic spring. Note that occasionally localized atmospheric dynamics can result in short lived small areas with low column ozone, so-called mini ozone holes (McCormack and Hood, 1997; James, 1998; Millán, L. F. and Manney, 2017).  
McCormack, J. P., & Hood, L. L. (1997). The frequency and size of ozone “mini-hole” events at northern midlatitudes in February. *Geophysical research letters*, 24(21), 2647-2650.  
James, Pi M. "A climatology of ozone mini-holes over the Northern Hemisphere." *International Journal of Climatology: A Journal of the Royal Meteorological Society* 18.12 (1998): 1287-1303.  
Millán, L. F. and Manney, G. L.: An assessment of ozone mini-hole representation in reanalyses over the Northern Hemisphere, *Atmos. Chem. Phys.*, 17, 9277–9289, <https://doi.org/10.5194/acp-17-9277-2017>,2017.  
Done. These are mentioned in lines 41–43.
- Introduction, line 53: change to “Long term analyses show that column ozone loss ...”  
Done. Please find it in line 46.
- Introduction, line 62, reference to Weber et al. (2005) in relation to stable TCO values since 2000 should be replaced with reference to Weber et al. (2018 and/or 2022, both in ACP). Weber et al. (2005) is hardly relevant for post year-2000 conditions.  
Done. Please find it in line 47.

- Introduction, lines 66-67. I do not understand the reference to Godin-Beekman et al. (2022) here. Does it mean that that paper like Bognar et al. (2022) shows a 1-3% reduction in lower stratospheric ozone since 2000? Or do you something else? Please clarify and modify the section accordingly.  
Done. Please note that we have now specified the values are regions with both references in lines 51-52.
- Introduction, line 77. Change to “Chipperfield et al. (2022) in response showed that ...”  
Done. Please find it in line 61.
- Introduction, line 82, change to “Southern Hemisphere” (capitals)  
Done. Please find it in line 66.
- Introduction, line 83. What “reprocessing” is referred to here? SHADOZ? And if so, does that mean that before the reprocessing SHADOZ data was not good enough? Please clarify.  
Done. Please find it in lines 67–69.
- Introduction, line 85. Possibly replace “thorough” with “in-depth”.  
Done. Please find it in line 73.
- Section 2, data: given the importance of exploring a range of ozone datasets a table with estimated errors/precisions (in %) would be useful (for limb also as a function of altitude). If not, errors/precisions are missing GOZCARDS, WOUDC-ECC, TOST, MERRA-2 and ERA5 and should be added.  
Done. We have included the errors attached with each dataset in the methods section.
- Section 2.1, line 96. Change to “ozone mixing ratios and standard errors ... hPa and in 10° latitude bins.”  
Done. Please find it in lines 82–83.
- Section 2.1, line 97-98. Change to “... ozone measurements. More details can ...”  
Done. Please find it in line 85.
- Section 2.1, line 99. Change to “... are based on measurements of limb-sounding ...”  
Done. Please find it in line 86.
- Section 2.1, lines 102-103. Change to “... by applying corrections calculated ...”  
Done. Please find it in line 89.
- Section 3.1, line 187. Change to “... from the satellite dataset GOZCARDS.”  
Done. Please find it in line 172.
- Section 3.1, line 189. I don’t know what is meant here with “effective”. Probably what is meant is that the tropical stratosphere is a region of net ozone production where as middle to high latitudes are regions of net ozone destruction. Please clarify.  
Done. We have used “higher” instead of effective there. Please find in it line 174.
- Section 3.1, line 191. minimum => minimal  
Done. Please find it in line 177.

- Section 3.1, line 193. Change to the 3-month nomenclature (DJF, MAM, JJA, SON) rather than seasons in the tropics middle-to-high latitude seasonality is not useful to describe tropical seasonality. Furthermore, also later there are frequent references to particular seasons but given the inverse seasonality between NH and SH preferably use the 3-month nomenclature (DJF, MAM, JJA, SON) which, depending on what is described, could be augmented with its season. Otherwise it is confusing to read as mentally one continuously has to think “which months are what season in which hemisphere”  
Done. This is done throughout the MS.
- Section 3.1, line 206. “very low values in the southern hemisphere spring and autumn”. I assume what is meant is spring and summer? SH ozone is not “very low” during autumn. Furthermore, probably better to write “very low values in the SH spring and low values in SH summer”.  
Done. Please find it in line 191.
- Section 3.1, line 223. “... no substantial loss in the tropics.” => add the time period for which this statement is made and valid.  
Done. Please find it in line 204.
- Section 3.1, line 225-227. Trend values for reanalysis data and the GSG data is missing. Possibly a table summarizing the various trends in various time periods/seasons/altitudes would be beneficial.  
Done. Please find it the table in Supplementary file, Table S1.
- Section 3.1, line 237. Change to “We have also estimated ...”  
Done. Please find it in line 219.
- Section 3.1, line 239. What is meant with “high statistically nonsignificant”? Please clarify.  
Done. High trend values, but nonsignificant. This is rephrased in line 221.
- Section 3.1, lines 260 & 262. Both lines mention differences in ppbv, but shouldn't that be ppmv?  
Done. Yes, Please find it in lines 239 and 241.
- Section 3.1, line 276. Remove comma in “note that, all these trends ...”  
Done. Rephrased the sentence.
- Section 3.1, line 277: replace “show” with “are”  
Done. Rephrased the sentence.
- Section 3.1, line 288. Change to “MAM, where trends are positive (0.25 +/- ...; Fig. S4).”  
Done. Rephrased the sentence in lines 241-243.
- Section 3.1, line 288. “all datasets” ... please clarify which datasets are meant here. Presumably all datasets discussed in this section?  
Done. Yes, please find it in lines 246-247.
- Section 3.1, lines 283 to 285. It appears there is an inconsistency with the previously used “ERA-5” as here it is “ERA 5” under the assumption this is not a print problem at my side.  
Done. We have made it uniform everywhere now, as ERA-5. For instance, lines 205, 213.

- Section 3.1, lines 286-287. Change to “In all datasets estimated post-1997 trends at tropical latitudes are either ...”  
[Done. We have paraphrase the sentence, please find it in lines 238–239.](#)
- Section 3.2, line 296. “past decades (1990-2000)” should be “(1990-2020)”  
[Done. Please find it in line 253.](#)
- Section 3.2, line 309. Add the following:  
Third, Lu [2022] incorrectly assigns tropical altitudes above 10 km to the stratosphere whereas the tropical troposphere extends to 16-18 km [Seidel et al., 2001] and where very low ozone concentrations can be found over the tropical Pacific due to vertical transport of clean tropical Pacific boundary layer air by convection [Kley et al., 1996]. Lu [2022] thereby incorrectly claims that Polvani et al. [2017] and Newton et al. [2018] report very low ozone values in the tropical lower stratosphere. Polvani et al. [2017] only discusses ozone at 70 hPa (18 km) and higher while Newton et al. [2018] assigns the low ozone observations to “uplift of almost-unmixed boundary-layer air” to altitudes of 100-150 hPa (14-17 km).  
Kley, D., Crutzen, P. J., Smit, H. G. J., Vömel, H., Oltmans, S. J., Grassl, H., & Ramanathan, V. (1996). Observations of near-zero ozone concentrations over the convective Pacific: Effects on air chemistry. *Science*, 274(5285), 230-233.  
Seidel, D. J., Ross, R. J., Angell, J. K., and Reid, G. C. (2001), Climatological characteristics of the tropical tropopause as revealed by radiosondes, *J. Geophys. Res.*, 106(D8), 7857–7878, doi:10.1029/2000JD900837.  
[Done. Please find it in lines 308–314.](#)
- Section 3.2. end of section, add: “And finally, already more than two decades ago it was well established that - based on all available observational data - trends in tropical stratospheric ozone were largely absent or minimal at best for the period 1979-1997 [Staehelin et al., 2001], something neither acknowledged nor discussed in Lu [2022].”  
Staehelin, J., Harris, N. R. P., Appenzeller, C., and Eberhard, J. (2001), Ozone trends: A review, *Rev. Geophys.*, 39(2), 231–290, doi:10.1029/1999RG000059.  
[Done. Please find it in lines 320–323.](#)
- Section 3.2, line 316. Delete “there”  
[Done.](#)
- Section 3.2, line 318. about => approximately  
[Done. Please find it in line 268.](#)
- Section 3.2, lines 320-321. In the tropical ozone => in tropical (lower) stratospheric ozone  
[Done. Please find it in line 268.](#)
- Section 3.2, line 333. Change to “at Southern Hemispheric stations.”  
[Done. Please find it in line 289.](#)
- Section 3.2, line 348. Change to “in polar regions and therefore the comparison”  
[Done. Please find it in line 305.](#)
- Section 3.2, line 352. Change to “No TCO measurements show”

Done. Please find it in line 314.

- Section 3.2, line 353. Change to “Formation of PSC particles is”  
Done. Please find it in line 316.
  - Section 3.3, line 362. Change to “are very small (20-30 ppb), which is expected there, the data”  
Done. Please find it in line 327.
  - Section 3.3, line 366. Change to “in the past decades according to our analysis of a wide range of available data.”  
Done. Please find it in lines 331–332.
  - Section 3.3, line 367. Delete the “However”, just start the sentence with “The recent strengthening”  
Done. Please find it in line 332.
  - Section 3.3, line 381. Change to “Henceforth, tropical lower stratospheric”  
Done. Please find it in line 348.
  - Section 3.3, line 384. Remove the comma in “and certainly there is no”  
Done. Please find it in line 350.
  - Section 3.3, line 386. Change to “However, the peak in ozone is around 30-35 km at these”  
Done. Please find it in line 352.
  - Section 3.3, line 387. Change to “Hence, the analyses of Lu (2022) miss”  
Done. Please find it in line 353.
  - Section 3.3, line 389. Change to “is solely based on one decadal dataset which has only four profiles”  
Done. Please find it in line 355.
  - Figure 2 caption. Change to “TCO less than 220 DU”  
Done. Please find it the revised Figure 1.
  - Figure 4. Since most of the trends are statistically insignificant, I think it would be better for the hatching to reflect the statistically significant trends. Hatching generally is used to identify statistically significant trends. Alternatively a second panel could be included showing only the significant trends. Same for Figure S1, S3, S4, S5 and S6.  
Done, we have re-drawn the figures, for instance, Figures S1, S3, S4 etc., with statistically significant trends stippled. Please find the new figures in the supplementary file.
  - Figure S8. Hatching of statistically significant trends is difficult if not impossible to discern. Maybe provide a second plot with only the statistically significant trends. Also, the figure caption should read “... ozonesonde profiles for different periods ... at the 95% CI level.”  
Done, we have redrawn the figure with statistically significant trends. Please find the new Figure S10 in the revised MS.
-
